# Supplementary material
Source: publisher figshare collection journal article supplement (https://frontiersin.figshare.com/ndownloader/files/34810528)
Supplement: Supplementary file 1 [file 34810528]

## Sheet: 评价计算
Category	Indicator name	Indicator nature	Years
			2012	2013	2014	2015	2016	max	min	standard	Normalization	c	Normalization	b	Normalization	a
Water resourceC1	D1（108m3）	（-）	8.16	8.77	9.12	9.8	10.1	10.1	8.16	1	1
	D2（108m3）	（+）	0.54	0.59	0.65	0.7	0.81	0.81	0.54	0	0	0.333333	0.57735
	D3（108m3）	（+）	449.84	496.73	557.4	615.16	669.7	669.7	449.84	0	0			0.685525	0.827965
EnvironmentC2	D4（108t）	（-）	10.98	12.86	15.75	17.33	19.66	19.66	10.98	1	1	0.5	0.793701
	D5（108m3）	（+）	1.56	1.84	2.02	2.35	2.58	2.58	1.56	0	0
EconomyC3	D6（亿元）	（+）	10309.5	11832.3	12814.6	13619.2	14870	14870	10309.5	0	0	0	0
	D7（亿元）	（+）	10265.7	11853.8	12840.6	12169.7	13022.9	13022.9	10265.7	0	0
Waste water treatmentC4	D8（108m3）	（+）	7.6	8.5	9.3	10.06	11.36	11.36	7.6	0	0	0	0	0	0	0.531765		R′=			0.05[(R2014-rn)/(rn+1-rn)+n]=				0.0312066
	D9（%）	（+）	0.76	0.79	0.82	0.85	0.88	0.88	0.76	0	0
	D10（%）	（+）	0.9	0.91	0.94	0.95	0.94	0.95	0.9	0	0
SocietyC5	D11	（+）	75	78	80	87	88	88	75	0	0	0	0
	D12	（+）	80	82	86	90	89	90	80	0	0
Economic impactC6	D13	（+）	7.16	7.7	8.07	12.89	9.1	12.89	7.16	0	0	0	0
	D14	（+）	3.1	3.36	3.6	3.9	4	4	3.1	0	0			0.346681	0.76733
EngineeringC7	D15	（-）	72	69	65	63	60	72	60	0	0	0.333333	0.693361
	D16	（-）	75	72	67	66	64	75	64	0	0
	D17	（-）	63	65	66	70	71	71	63	1	1
all the lowest layer indicators are set to 0	grade 0	dvalue	Normalization	c	Normalization	b	Normalization	a
Water resourceC1	D1（108m3）	0	0
	D2（108m3）	0	0	0	0
	D3（108m3）	0	0			0	0
EnvironmentC2	D4（108t）	0	0	0	0
	D5（108m3）	0	0
EconomyC3	D6（亿元）	0	0	0	0
	D7（亿元）	0	0
Waste water treatmentC4	D8（108m3）	0	0	0	0	0	0	0
	D9（%）	0	0
	D10（%）	0	0
SocietyC5	D11	0	0	0	0
	D12	0	0
Economic impactC6	D13	0	0	0	0
	D14	0	0			0	0
EngineeringC7	D15	0	0	0	0
	D16	0	0
	D17	0	0
all the lowest layer indicators are set to 0.05	1	dvalue	Normalization	c	Normalization	b	Normalization	a
Water resourceC1	D1（108m3）	0.05	0.223607
	D2（108m3）	0.05	0.368403	0.35496	0.595785
	D3（108m3）	0.05	0.472871			0.631117	0.794429
EnvironmentC2	D4（108t）	0.05	0.223607	0.296005	0.666448
	D5（108m3）	0.05	0.368403
EconomyC3	D6（亿元）	0.05	0.223607	0.296005	0.544063
	D7（亿元）	0.05	0.368403
Waste water treatmentC4	D8（108m3）	0.05	0.223607	0.35496	0.708043	0.663238	0.87208	0.852008
	D9（%）	0.05	0.368403
	D10（%）	0.05	0.472871
SocietyC5	D11	0.05	0.223607	0.296005	0.737607
	D12	0.05	0.368403
Economic impactC6	D13	0.05	0.223607	0.296005	0.544063
	D14	0.05	0.368403			0.626053	0.889514
EngineeringC7	D15	0.05	0.223607	0.35496	0.708043
	D16	0.05	0.368403
	D17	0.05	0.472871
all the lowest layer indicators are set to 0.1	2	dvalue	Normalization	c	Normalization	b	Normalization	a
Water resourceC1	D1（108m3）	0.1	0.316228
	D2（108m3）	0.1	0.464159	0.447576	0.669011
	D3（108m3）	0.1	0.562341			0.699873	0.836584
EnvironmentC2	D4（108t）	0.1	0.316228	0.390193	0.730735
	D5（108m3）	0.1	0.464159
EconomyC3	D6（亿元）	0.1	0.316228	0.390193	0.624655
	D7（亿元）	0.1	0.464159
Waste water treatmentC4	D8（108m3）	0.1	0.316228	0.447576	0.764931	0.726645	0.89903	0.882867
	D9（%）	0.1	0.464159
	D10（%）	0.1	0.562341
SocietyC5	D11	0.1	0.316228	0.390193	0.790351
	D12	0.1	0.464159
Economic impactC6	D13	0.1	0.316228	0.390193	0.624655
	D14	0.1	0.464159			0.694793	0.912985
EngineeringC7	D15	0.1	0.316228	0.447576	0.764931
	D16	0.1	0.464159
	D17	0.1	0.562341
all the lowest layer indicators are set to 0.15	3	dvalue	Normalization	c	Normalization	b	Normalization	a
Water resourceC1	D1（108m3）	0.15	0.387298
	D2（108m3）	0.15	0.531329	0.513654	0.716696
	D3（108m3）	0.15	0.622333			0.744128	0.862629
EnvironmentC2	D4（108t）	0.15	0.387298	0.459314	0.77156
	D5（108m3）	0.15	0.531329
EconomyC3	D6（亿元）	0.15	0.387298	0.459314	0.677727
	D7（亿元）	0.15	0.531329
Waste water treatmentC4	D8（108m3）	0.15	0.387298	0.513654	0.80086	0.767276	0.915484	0.901793
	D9（%）	0.15	0.531329
	D10（%）	0.15	0.622333
SocietyC5	D11	0.15	0.387298	0.459314	0.823242
	D12	0.15	0.531329
Economic impactC6	D13	0.15	0.387298	0.459314	0.677727
	D14	0.15	0.531329			0.739294	0.927266
EngineeringC7	D15	0.15	0.387298	0.513654	0.80086
	D16	0.15	0.531329
	D17	0.15	0.622333
all the lowest layer indicators are set to 0.2	4	dvalue	Normalization	c	Normalization	b	Normalization	a
Water resourceC1	D1（108m3）	0.2	0.447214
	D2（108m3）	0.2	0.584804	0.566919	0.75294
	D3（108m3）	0.2	0.66874			0.777511	0.881766
EnvironmentC2	D4（108t）	0.2	0.447214	0.516009	0.802082
	D5（108m3）	0.2	0.584804
EconomyC3	D6（亿元）	0.2	0.447214	0.516009	0.718337
	D7（亿元）	0.2	0.584804
Waste water treatmentC4	D8（108m3）	0.2	0.447214	0.566919	0.827638	0.797841	0.927482	0.915634
	D9（%）	0.2	0.584804
	D10（%）	0.2	0.66874
SocietyC5	D11	0.2	0.447214	0.516009	0.847548
	D12	0.2	0.584804
Economic impactC6	D13	0.2	0.447214	0.516009	0.718337
	D14	0.2	0.584804			0.772988	0.937655
EngineeringC7	D15	0.2	0.447214	0.566919	0.827638
	D16	0.2	0.584804
	D17	0.2	0.66874
all the lowest layer indicators are set to 0.25	5	dvalue	Normalization	c	Normalization	b	Normalization	a
Water resourceC1	D1（108m3）	0.25	0.5
	D2（108m3）	0.25	0.629961	0.612356	0.782532
	D3（108m3）	0.25	0.707107			0.804612	0.897002
EnvironmentC2	D4（108t）	0.25	0.5	0.56498	0.826693
	D5（108m3）	0.25	0.629961
EconomyC3	D6（亿元）	0.25	0.5	0.56498	0.751652
	D7（亿元）	0.25	0.629961
Waste water treatmentC4	D8（108m3）	0.25	0.5	0.612356	0.849183	0.822604	0.93698	0.926616
	D9（%）	0.25	0.629961
	D10（%）	0.25	0.707107
SocietyC5	D11	0.25	0.5	0.56498	0.866978
	D12	0.25	0.629961
Economic impactC6	D13	0.25	0.5	0.56498	0.751652
	D14	0.25	0.629961			0.800417	0.945865
EngineeringC7	D15	0.25	0.5	0.612356	0.849183
	D16	0.25	0.629961
	D17	0.25	0.707107
all the lowest layer indicators are set to 0.3	6	dvalue	Normalization	c	Normalization	b	Normalization	a
Water resourceC1	D1（108m3）	0.3	0.547723
	D2（108m3）	0.3	0.669433	0.652413	0.807721
	D3（108m3）	0.3	0.740083			0.827577	0.909713
EnvironmentC2	D4（108t）	0.3	0.547723	0.608578	0.847433
	D5（108m3）	0.3	0.669433
EconomyC3	D6（亿元）	0.3	0.547723	0.608578	0.780114
	D7（亿元）	0.3	0.669433
Waste water treatmentC4	D8（108m3）	0.3	0.547723	0.652413	0.86731	0.843555	0.944868	0.935751
	D9（%）	0.3	0.669433
	D10（%）	0.3	0.740083
SocietyC5	D11	0.3	0.547723	0.608578	0.883241
	D12	0.3	0.669433
Economic impactC6	D13	0.3	0.547723	0.608578	0.780114
	D14	0.3	0.669433			0.823712	0.952673
EngineeringC7	D15	0.3	0.547723	0.652413	0.86731
	D16	0.3	0.669433
	D17	0.3	0.740083
all the lowest layer indicators are set to 0.35	7	dvalue	Normalization	c	Normalization	b	Normalization	a
Water resourceC1	D1（108m3）	0.35	0.591608
	D2（108m3）	0.35	0.70473	0.688499	0.829759
	D3（108m3）	0.35	0.769161			0.847592	0.920647
EnvironmentC2	D4（108t）	0.35	0.591608	0.648169	0.865425
	D5（108m3）	0.35	0.70473
EconomyC3	D6（亿元）	0.35	0.591608	0.648169	0.805089
	D7（亿元）	0.35	0.70473
Waste water treatmentC4	D8（108m3）	0.35	0.591608	0.688499	0.883015	0.861791	0.951628	0.943592
	D9（%）	0.35	0.70473
	D10（%）	0.35	0.769161
SocietyC5	D11	0.35	0.591608	0.648169	0.897268
	D12	0.35	0.70473
Economic impactC6	D13	0.35	0.591608	0.648169	0.805089
	D14	0.35	0.70473			0.844052	0.9585
EngineeringC7	D15	0.35	0.591608	0.688499	0.883015
	D16	0.35	0.70473
	D17	0.35	0.769161
all the lowest layer indicators are set to 0.4	8	dvalue	Normalization	c	Normalization	b	Normalization	a
Water resourceC1	D1（108m3）	0.4	0.632456
	D2（108m3）	0.4	0.736806	0.721511	0.849418
	D3（108m3）	0.4	0.795271			0.865388	0.930262
EnvironmentC2	D4（108t）	0.4	0.632456	0.684631	0.881358
	D5（108m3）	0.4	0.736806
EconomyC3	D6（亿元）	0.4	0.632456	0.684631	0.827424
	D7（亿元）	0.4	0.736806
Waste water treatmentC4	D8（108m3）	0.4	0.632456	0.721511	0.896907	0.877987	0.957553	0.950472
	D9（%）	0.4	0.736806
	D10（%）	0.4	0.795271
SocietyC5	D11	0.4	0.632456	0.684631	0.909629
	D12	0.4	0.736806
Economic impactC6	D13	0.4	0.632456	0.684631	0.827424
	D14	0.4	0.736806			0.862166	0.963602
EngineeringC7	D15	0.4	0.632456	0.721511	0.896907
	D16	0.4	0.736806
	D17	0.4	0.795271
all the lowest layer indicators are set to 0.45	9	dvalue	Normalization	c	Normalization	b	Normalization	a
Water resourceC1	D1（108m3）	0.45	0.67082
	D2（108m3）	0.45	0.766309	0.752055	0.867211
	D3（108m3）	0.45	0.819036			0.881448	0.938855
EnvironmentC2	D4（108t）	0.45	0.67082	0.718565	0.895685
	D5（108m3）	0.45	0.766309
EconomyC3	D6（亿元）	0.45	0.67082	0.718565	0.847682
	D7（亿元）	0.45	0.766309
Waste water treatmentC4	D8（108m3）	0.45	0.67082	0.752055	0.90939	0.892589	0.962832	0.95661
	D9（%）	0.45	0.766309
	D10（%）	0.45	0.819036
SocietyC5	D11	0.45	0.67082	0.718565	0.920697
	D12	0.45	0.766309
Economic impactC6	D13	0.45	0.67082	0.718565	0.847682
	D14	0.45	0.766309			0.878536	0.968144
EngineeringC7	D15	0.45	0.67082	0.752055	0.90939
	D16	0.45	0.766309
	D17	0.45	0.819036
all the lowest layer indicators are set to 0.5	10	dvalue	Normalization	c	Normalization	b	Normalization	a
Water resourceC1	D1（108m3）	0.5	0.707107
	D2（108m3）	0.5	0.793701	0.780568	0.883498
	D3（108m3）	0.5	0.840896			0.89611	0.946631
EnvironmentC2	D4（108t）	0.5	0.707107	0.750404	0.908723
	D5（108m3）	0.5	0.793701
EconomyC3	D6（亿元）	0.5	0.707107	0.750404	0.866258
	D7（亿元）	0.5	0.793701
Waste water treatmentC4	D8（108m3）	0.5	0.707107	0.780568	0.92074	0.905909	0.967598	0.962156
	D9（%）	0.5	0.793701
	D10（%）	0.5	0.840896
SocietyC5	D11	0.5	0.707107	0.750404	0.93073
	D12	0.5	0.793701
Economic impactC6	D13	0.5	0.707107	0.750404	0.866258
	D14	0.5	0.793701			0.893499	0.97224
EngineeringC7	D15	0.5	0.707107	0.780568	0.92074
	D16	0.5	0.793701
	D17	0.5	0.840896
all the lowest layer indicators are set to 0.55	11	dvalue	Normalization	c	Normalization	b	Normalization	a
Water resourceC1	D1（108m3）	0.55	0.74162
	D2（108m3）	0.55	0.819321	0.807372	0.898539
	D3（108m3）	0.55	0.861174			0.90962	0.95374
EnvironmentC2	D4（108t）	0.55	0.74162	0.780471	0.920701
	D5（108m3）	0.55	0.819321
EconomyC3	D6（亿元）	0.55	0.74162	0.780471	0.883442
	D7（亿元）	0.55	0.819321
Waste water treatmentC4	D8（108m3）	0.55	0.74162	0.807372	0.93116	0.918173	0.971945	0.967219
	D9（%）	0.55	0.819321
	D10（%）	0.55	0.861174
SocietyC5	D11	0.55	0.74162	0.780471	0.939916
	D12	0.55	0.819321
Economic impactC6	D13	0.55	0.74162	0.780471	0.883442
	D14	0.55	0.819321			0.907301	0.975973
EngineeringC7	D15	0.55	0.74162	0.807372	0.93116
	D16	0.55	0.819321
	D17	0.55	0.861174
all the lowest layer indicators are set to 0.6	12	dvalue	Normalization	c	Normalization	b	Normalization	a
Water resourceC1	D1（108m3）	0.6	0.774597
	D2（108m3）	0.6	0.843433	0.832714	0.912531
	D3（108m3）	0.6	0.880112			0.922162	0.960292
EnvironmentC2	D4（108t）	0.6	0.774597	0.809015	0.931792
	D5（108m3）	0.6	0.843433
EconomyC3	D6（亿元）	0.6	0.774597	0.809015	0.899452
	D7（亿元）	0.6	0.843433
Waste water treatmentC4	D8（108m3）	0.6	0.774597	0.832714	0.940803	0.92955	0.975943	0.97188
	D9（%）	0.6	0.843433
	D10（%）	0.6	0.880112
SocietyC5	D11	0.6	0.774597	0.809015	0.948395
	D12	0.6	0.843433
Economic impactC6	D13	0.6	0.774597	0.809015	0.899452
	D14	0.6	0.843433			0.920128	0.979404
EngineeringC7	D15	0.6	0.774597	0.832714	0.940803
	D16	0.6	0.843433
	D17	0.6	0.880112
all the lowest layer indicators are set to 0.65	13	dvalue	Normalization	c	Normalization	b	Normalization	a
Water resourceC1	D1（108m3）	0.65	0.806226
	D2（108m3）	0.65	0.866239	0.856789	0.925629
	D3（108m3）	0.65	0.897901			0.933877	0.966373
EnvironmentC2	D4（108t）	0.65	0.806226	0.836232	0.942126
	D5（108m3）	0.65	0.866239
EconomyC3	D6（亿元）	0.65	0.806226	0.836232	0.914457
	D7（亿元）	0.65	0.866239
Waste water treatmentC4	D8（108m3）	0.65	0.806226	0.856789	0.949783	0.940171	0.979646	0.9762
	D9（%）	0.65	0.866239
	D10（%）	0.65	0.897901
SocietyC5	D11	0.65	0.806226	0.836232	0.956273
	D12	0.65	0.866239
Economic impactC6	D13	0.65	0.806226	0.836232	0.914457
	D14	0.65	0.866239			0.93212	0.98258
EngineeringC7	D15	0.65	0.806226	0.856789	0.949783
	D16	0.65	0.866239
	D17	0.65	0.897901
all the lowest layer indicators are set to 0.7	14	dvalue	Normalization	c	Normalization	b	Normalization	a
Water resourceC1	D1（108m3）	0.7	0.83666
	D2（108m3）	0.7	0.887904	0.879752	0.937951
	D3（108m3）	0.7	0.914691			0.94488	0.972049
EnvironmentC2	D4（108t）	0.7	0.83666	0.862282	0.951809
	D5（108m3）	0.7	0.887904
EconomyC3	D6（亿元）	0.7	0.83666	0.862282	0.928591
	D7（亿元）	0.7	0.887904
Waste water treatmentC4	D8（108m3）	0.7	0.83666	0.879752	0.958194	0.95014	0.983096	0.980228
	D9（%）	0.7	0.887904
	D10（%）	0.7	0.914691
SocietyC5	D11	0.7	0.83666	0.862282	0.963634
	D12	0.7	0.887904
Economic impactC6	D13	0.7	0.83666	0.862282	0.928591
	D14	0.7	0.887904			0.943393	0.985537
EngineeringC7	D15	0.7	0.83666	0.879752	0.958194
	D16	0.7	0.887904
	D17	0.7	0.914691
all the lowest layer indicators are set to 0.75	15	dvalue	Normalization	c	Normalization	b	Normalization	a
Water resourceC1	D1（108m3）	0.75	0.866025
	D2（108m3）	0.75	0.90856	0.90173	0.949595
	D3（108m3）	0.75	0.930605			0.955259	0.977374
EnvironmentC2	D4（108t）	0.75	0.866025	0.887293	0.960924
	D5（108m3）	0.75	0.90856
EconomyC3	D6（亿元）	0.75	0.866025	0.887293	0.941962
	D7（亿元）	0.75	0.90856
Waste water treatmentC4	D8（108m3）	0.75	0.866025	0.90173	0.966108	0.959539	0.986327	0.984002
	D9（%）	0.75	0.90856
	D10（%）	0.75	0.930605
SocietyC5	D11	0.75	0.866025	0.887293	0.970547
	D12	0.75	0.90856
Economic impactC6	D13	0.75	0.866025	0.887293	0.941962
	D14	0.75	0.90856			0.954035	0.988305
EngineeringC7	D15	0.75	0.866025	0.90173	0.966108
	D16	0.75	0.90856
	D17	0.75	0.930605
all the lowest layer indicators are set to 0.8	16	dvalue	Normalization	c	Normalization	b	Normalization	a
Water resourceC1	D1（108m3）	0.8	0.894427
	D2（108m3）	0.8	0.928318	0.922829	0.96064
	D3（108m3）	0.8	0.945742			0.965089	0.98239
EnvironmentC2	D4（108t）	0.8	0.894427	0.911372	0.969539
	D5（108m3）	0.8	0.928318
EconomyC3	D6（亿元）	0.8	0.894427	0.911372	0.954658
	D7（亿元）	0.8	0.928318
Waste water treatmentC4	D8（108m3）	0.8	0.894427	0.922829	0.973585	0.968436	0.989366	0.987554
	D9（%）	0.8	0.928318
	D10（%）	0.8	0.945742
SocietyC5	D11	0.8	0.894427	0.911372	0.977066
	D12	0.8	0.928318
Economic impactC6	D13	0.8	0.894427	0.911372	0.954658
	D14	0.8	0.928318			0.964121	0.990907
EngineeringC7	D15	0.8	0.894427	0.922829	0.973585
	D16	0.8	0.928318
	D17	0.8	0.945742
all the lowest layer indicators are set to 0.85	17	dvalue	Normalization	c	Normalization	b	Normalization	a
Water resourceC1	D1（108m3）	0.85	0.921954
	D2（108m3）	0.85	0.947268	0.943136	0.971152
	D3（108m3）	0.85	0.960185			0.974431	0.987133
EnvironmentC2	D4（108t）	0.85	0.921954	0.934611	0.977711
	D5（108m3）	0.85	0.947268
EconomyC3	D6（亿元）	0.85	0.921954	0.934611	0.966753
	D7（亿元）	0.85	0.947268
Waste water treatmentC4	D8（108m3）	0.85	0.921954	0.943136	0.980674	0.976888	0.992236	0.99091
	D9（%）	0.85	0.947268
	D10（%）	0.85	0.960185
SocietyC5	D11	0.85	0.921954	0.934611	0.983236
	D12	0.85	0.947268
Economic impactC6	D13	0.85	0.921954	0.934611	0.966753
	D14	0.85	0.947268			0.973714	0.993363
EngineeringC7	D15	0.85	0.921954	0.943136	0.980674
	D16	0.85	0.947268
	D17	0.85	0.960185
all the lowest layer indicators are set to 0.9	18	dvalue	Normalization	c	Normalization	b	Normalization	a
Water resourceC1	D1（108m3）	0.9	0.948683
	D2（108m3）	0.9	0.965489	0.962725	0.981186
	D3（108m3）	0.9	0.974004			0.983336	0.991633
EnvironmentC2	D4（108t）	0.9	0.948683	0.957086	0.985486
	D5（108m3）	0.9	0.965489
EconomyC3	D6（亿元）	0.9	0.948683	0.957086	0.978308
	D7（亿元）	0.9	0.965489
Waste water treatmentC4	D8（108m3）	0.9	0.948683	0.962725	0.987418	0.98494	0.994955	0.994092
	D9（%）	0.9	0.965489
	D10（%）	0.9	0.974004
SocietyC5	D11	0.9	0.948683	0.957086	0.989094
	D12	0.9	0.965489
Economic impactC6	D13	0.9	0.948683	0.957086	0.978308
	D14	0.9	0.965489			0.982863	0.995688
EngineeringC7	D15	0.9	0.948683	0.962725	0.987418
	D16	0.9	0.965489
	D17	0.9	0.974004
all the lowest layer indicators are set to 0.95	19	dvalue	Normalization	c	Normalization	b	Normalization	a
Water resourceC1	D1（108m3）	0.95	0.974679
	D2（108m3）	0.95	0.983048	0.981662	0.990788
	D3（108m3）	0.95	0.987259			0.991846	0.995915
EnvironmentC2	D4（108t）	0.95	0.974679	0.978864	0.992904
	D5（108m3）	0.95	0.983048
EconomyC3	D6（亿元）	0.95	0.974679	0.978864	0.989375
	D7（亿元）	0.95	0.983048
Waste water treatmentC4	D8（108m3）	0.95	0.974679	0.981662	0.99385	0.992633	0.997538	0.997117
	D9（%）	0.95	0.983048
	D10（%）	0.95	0.987259
SocietyC5	D11	0.95	0.974679	0.978864	0.994673
	D12	0.95	0.983048
Economic impactC6	D13	0.95	0.974679	0.978864	0.989375
	D14	0.95	0.983048			0.991612	0.997896
EngineeringC7	D15	0.95	0.974679	0.981662	0.99385
	D16	0.95	0.983048
	D17	0.95	0.987259
all the lowest layer indicators are set to 1	20	dvalue	Normalization	c	Normalization	b	Normalization	a
Water resourceC1	D1（108m3）	1	1
	D2（108m3）	1	1	1	1
	D3（108m3）	1	1			1	1
EnvironmentC2	D4（108t）	1	1	1	1
	D5（108m3）	1	1
EconomyC3	D6（亿元）	1	1	1	1
	D7（亿元）	1	1
Waste water treatmentC4	D8（108m3）	1	1	1	1	1	1	1
	D9（%）	1	1
	D10（%）	1	1
SocietyC5	D11	1	1	1	1
	D12	1	1
Economic impactC6	D13	1	1	1	1
	D14	1	1			1	1
EngineeringC7	D15	1	1	1	1
	D16	1	1
	D17	1	1
